## Pulmonary hypertension and congenital heart disease: medical treatment and risk factors for survival

J. Playan Escribano<sup>1</sup>, T. Segura De La Cal<sup>2</sup>, J. Segovia Cubero<sup>3</sup>, J. Rueda Soriano<sup>4</sup>, F.J. Garcia Hernandez<sup>5</sup>, M. Lopez Meseguer<sup>6</sup>, G.M. Perez Penate<sup>7</sup>, A. Lara Padron<sup>8</sup>, A. Campo Ezquibela<sup>9</sup>, E. Sala Llinas<sup>10</sup>, T. Mombiela<sup>11</sup>, F.J. Guerra Ramos<sup>12</sup>, G.J. Samper<sup>13</sup>, I. Blanco<sup>14</sup>, P. Escribano Subias<sup>2</sup>

<sup>1</sup>Hospital Clinico San Carlos, Madrid, Spain; <sup>2</sup>University Hospital 12 de Octubre, Madrid, Spain; <sup>3</sup>University Hospital Puerta de Hierro Majadahonda, Madrid, Spain; <sup>4</sup>Hospital Universitario y Politecnico La Fe, Valencia, Spain; <sup>5</sup>Complex Public Hospital Virgen del Rocio Regional, Sevilla, Spain, Spain; <sup>6</sup>University Hospital Vall d'Hebron, Barcelona, Spain; <sup>7</sup>University Hospital Dr Negrin, Las Palmas de Gran Canaria, Spain; <sup>8</sup>University Hospital of the Canaries, Santa Cruz de Tenerife, Spain; <sup>9</sup>University of Navarra Clinic, Pamplona, Spain; <sup>10</sup>University Hospital Son Espases, Palma de Mallorca, Spain; <sup>11</sup>University Hospital Gregorio Maranon, Madrid, Spain; <sup>12</sup>University Hospital Insular of Gran Canaria, Las Palmas De Gran Canaria, Spain; <sup>13</sup>General University Hospital of Valencia Consortium, Valencia, Spain; <sup>14</sup>Hospital Clinic de Barcelona, Barcelona, Spain

On behalf of REHAP investigators

**Funding Acknowledgement:** Type of funding source: Private grant(s) and/or Sponsorship. Main funding source(s): Ferrer, Janssen

**Background:** Pulmonary arterial hypertension (PAH) is a common comorbidity in congenital heart disease (CHD) and significantly affects prognosis. There are four large clinical groups of CHD-related PAH: Eisenmenger syndrome, PAH associated with non-restrictive shunt, PAH associated with restrictive shunt and postoperative PAH. Our purpose was to study the clinical and prognostic differences among them.

**Methods:** The REHAP is a Spanish multicentre voluntary registry of patients over 14 years of age, which includes patients with CHD and PAH, starting in 2007. 664 patients were analyzed: Baseline characteristics, functional class, right catheterization data, treatment and survival were compared.

**Results:** 664 patients were analyzed: characteristics are detailed in the table. Patients with Eisenmenger were more frequently treated with

oral monotherapy as a first line therapy and received less frequently prostanoids during the follow-up. Patients with Eisenmenger had significantly better prognosis, with the best long-term survival of the 4 groups. In a cox regression model, postoperative PAH has a 1.7 hazard ratio (HR) (reference group: Eisenmenger) after adjustment for age (HR 1.02 p 0,001), functional class (HR NYHA III-IV 2.3 p<0,001), sex (p 0.8) and pulmonary vascular resistance (p 0.7).

**Conclusion:** The clinical classification of PAH associated with CHD defines both the baseline characteristics and the prognosis of patients. Outcome relates closely to functional class and type of PAH-CHD. Eisenmenger group, which has the most severe hemodynamics, is the one with the best prognosis despite a less aggressive treatment.

|                                                       | Eisenmenger | Large left to right shunt | Small shunt | Postoperative | All      | p      |
|-------------------------------------------------------|-------------|---------------------------|-------------|---------------|----------|--------|
| N, n%                                                 | 371 (56)    | 68 (10)                   | 62 (9)      | 159 (24)      | 660      |        |
| Age (years), mean ± SD                                | 34±16       | 46±17                     | 46±19       | 40±17         | 38±17    | <0.001 |
| Sex (female), n (%)                                   | 236 (64)    | 52 (76)                   | 45 (73)     | 112 (70)      | 445 (67) | 0.094  |
| NYHA Functional class III-IV, n (%)                   | 191 (51)    | 36 (53)                   | 31 (50)     | 71 (45)       | 329 (50) | 0.499  |
| Right atrial pressure (mmHg), mean ± SD               | 8±5         | 9±4                       | 9±5         | 10±6          | 9±5      | 0.001  |
| Pulmonary vascular resistance (Wood Units), mean ± SD | 14±7        | 10±8                      | 9±5         | 10±7          | 11±7     | <0.001 |
| First line therapy                                    |             |                           |             |               |          | 0.001  |
| Oral monotherapy, n (%)                               | 277 (90)    | 38 (78)                   | 44 (83)     | 112 (81)      | 471 (86) |        |
| Oral combination therapy, n (%)                       | 8 (3)       | 7 (14)                    | 7 (13)      | 8 (6)         | 30 (5)   |        |
| Combination therapy with prostanoids, n (%)           | 5 (2)       | 1 (2)                     | 2 (4)       | 3 (2)         | 11 (2)   |        |
| Prostanoids at any time during follow up, n (%)       | 63 (17)     | 10 (15)                   | 16 (25)     | 45 (28)       | 134 (20) | 0.01   |

NYHA: New York Heart Association; 6MWD: six-minute walking distance.

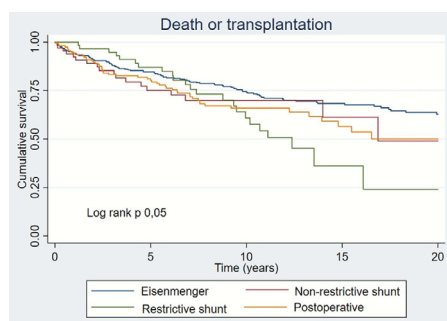

Source: http://academic.oup.com/eurheartj/article-pdf/41/Supplement_2/ehaa946.2299/34522841/ehaa946.2299.pdf
